# Supplementary material for: Power-dependent upconversion luminescence properties of self-sensitized Er2WO6 phosphor
Source: Royal Society of Chemistry journal article supplement (doi:10.1039/d0dt03081c), 2020-11-23
Supplement: d0dt03081c1.pdf [file d0dt03081c1.pdf]

## Upconversion luminescence properties of Yb<sup>3+</sup> free self-sensitized Er<sub>2</sub>WO<sub>6</sub> phosphor

Rajagopalan Krishnan<sup>a,\*</sup>, Samvit G. Menon<sup>a</sup>, Dirk Poelman<sup>b</sup>, Robin E. Kroon<sup>a</sup>, Hendrik C. Swart<sup>a,\*</sup>

<sup>a</sup>Department of Physics, University of the Free State, Bloemfontein, South Africa.

<sup>b</sup>LumiLab, Department of Solid-State Sciences, Ghent University, Ghent, 9000, Belgium

\*Corresponding author: *krishnanrphy@gmail.com & swarthc@ufs.ac.za*

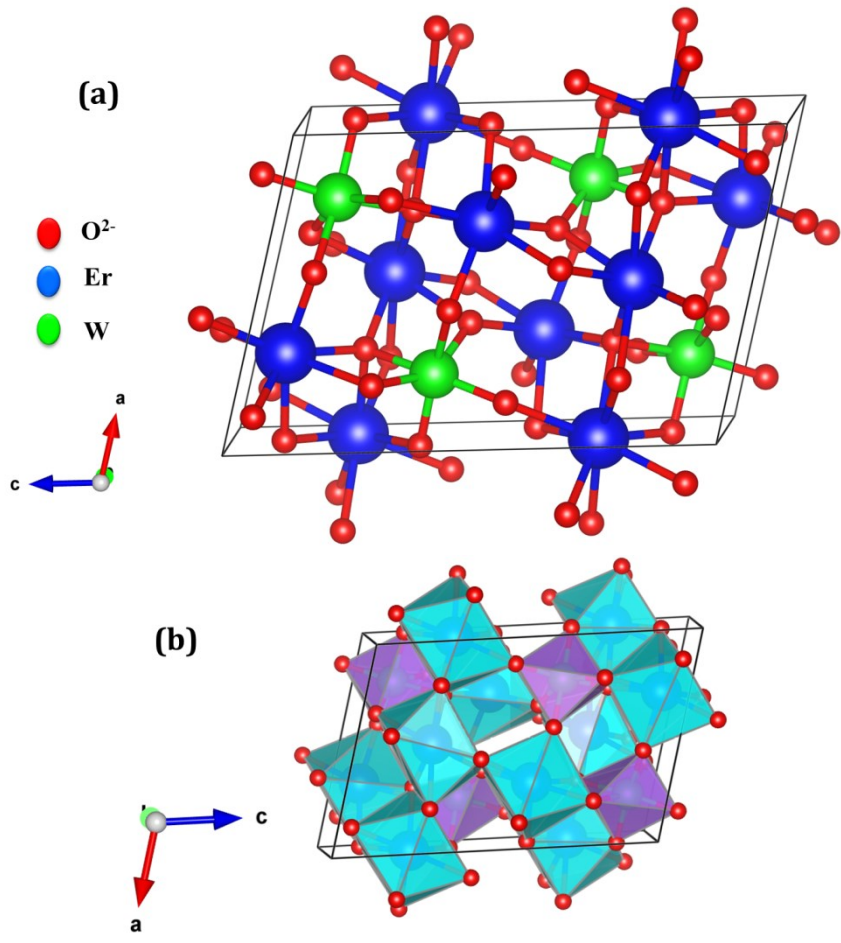

**Fig. 1** (a) Octahedra around the W atoms forming a  $[WO_6]^{6-}$  cluster, (c) polyhedral site of the  $Er_2WO_6$  phosphor material

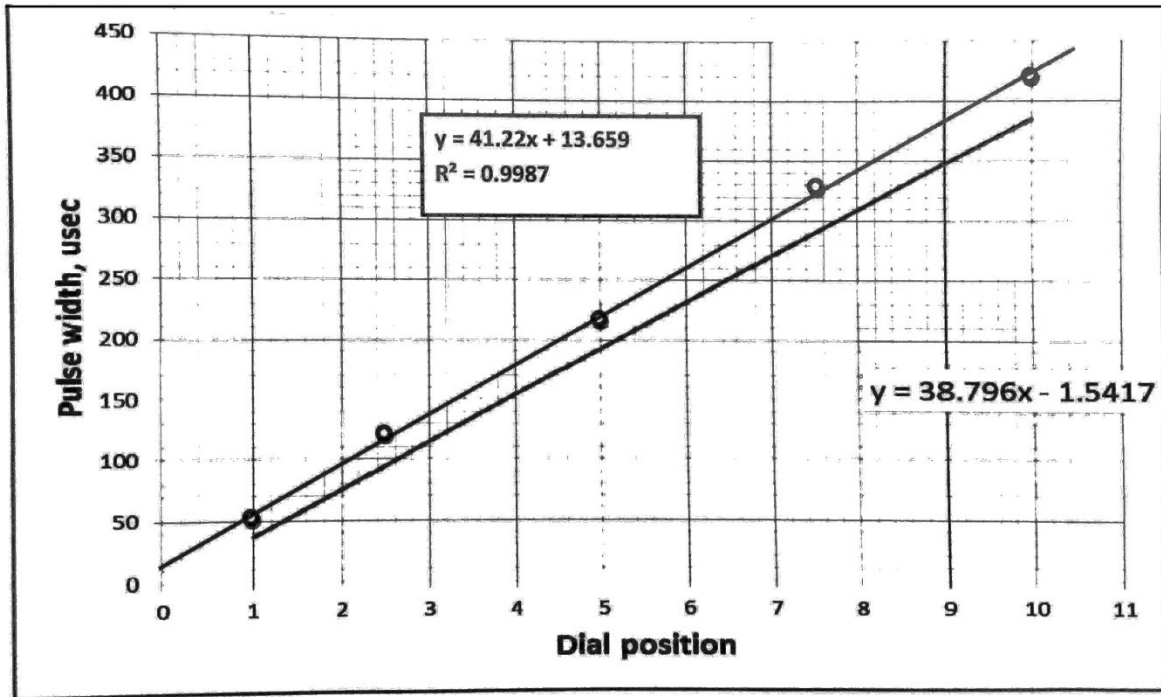

Fig. 2 Pulse width used in the FLS 980 Edinburgh instrument.
